# Supplementary material
Source: PubMed Central journal article supplement (PMC6512269)
Supplement: jamaoncol-5-681-s001.pdf [file jamaoncol-5-681-s001.pdf]

1 **A Phase II Trial Measuring the Integration of Stereotactic**  
2 **Radiotherapy *plus* Surgery in Early Non-Small Cell Lung**  
3 **Cancer**

4  
5 **Supplemental Appendix**

6  
7  
8 **Table of Contents**

9  
10 **Full Protocol (version 1.3).....2**

11  
12 **Summary of Amendments During Study.....39**

13 **A Phase II Trial Measuring the Integration of Stereotactic**  
14 **Radiotherapy *plus* Surgery in Early Non-Small Cell Lung**  
15 **Cancer**

16  
17 **(MISSILE-NSCLC)**

18  
19  
20 **Principal Investigators**

21  
22 Dr. David Palma (Radiation Oncology)  
23 Dr. Richard Incelet (Thoracic Surgical Oncology)  
24 Dr. Aaron Ward (Imaging Science)  
25

26  
27 **Investigators**

28  
29 **Radiation Oncology** 40 **Thoracic Surgery** 47 **Imaging /Physics**  
30 Dr. George Rodrigues 41 Dr. Richard Malthaner 48 Dr. Stewart Gaede  
31 Dr. Brian Yaremko 42 Dr. Dalilah Fortin 49 Dr. Mark Landis  
32 Dr. Rashid Dar 43 Dr. Eric Frechette 50 Dr. Ting Lee  
33 Dr. Edward Yu 44 51 Dr. Frank Prato  
34 45  
35 **Pathology** 46  
36 Dr. Keith Kwan  
37 Dr. Mariamma Joseph  
38

529

|    |                                                             |
|----|-------------------------------------------------------------|
| 53 |                                                             |
| 54 | <b><u>INDEX</u></b>                                         |
| 55 |                                                             |
| 56 | 1.0 Introduction                                            |
| 57 |                                                             |
| 58 | 2.0 Objectives                                              |
| 59 |                                                             |
| 60 | 3.0 Trial Design                                            |
| 61 |                                                             |
| 62 | 4.0 Patient Selection                                       |
| 63 |                                                             |
| 64 | 5.0 Pre-Treatment Evaluation                                |
| 65 |                                                             |
| 66 | 6.0 Treatment Plan                                          |
| 67 |                                                             |
| 68 | 7.0 Adverse Events                                          |
| 69 |                                                             |
| 70 | 8.0 Subject Withdrawal                                      |
| 71 |                                                             |
| 72 | 9.0 Follow-up Evaluation and Assessment of Efficacy         |
| 73 |                                                             |
| 74 | 10.0 Statistical Considerations and Sample Size Calculation |
| 75 |                                                             |
| 76 | 11.0 Ethical Considerations                                 |
| 77 |                                                             |
| 78 | 12.0 Biomarker Studies                                      |
| 79 |                                                             |
| 80 |                                                             |
| 81 |                                                             |
| 82 | <b><u>APPENDICES</u></b>                                    |
| 83 |                                                             |
| 84 | 1. Radiotherapy Dose Constraints                            |
| 85 | 2. Letter of Information (Template)                         |
| 86 |                                                             |
| 87 |                                                             |

**STUDY SCHEMA**

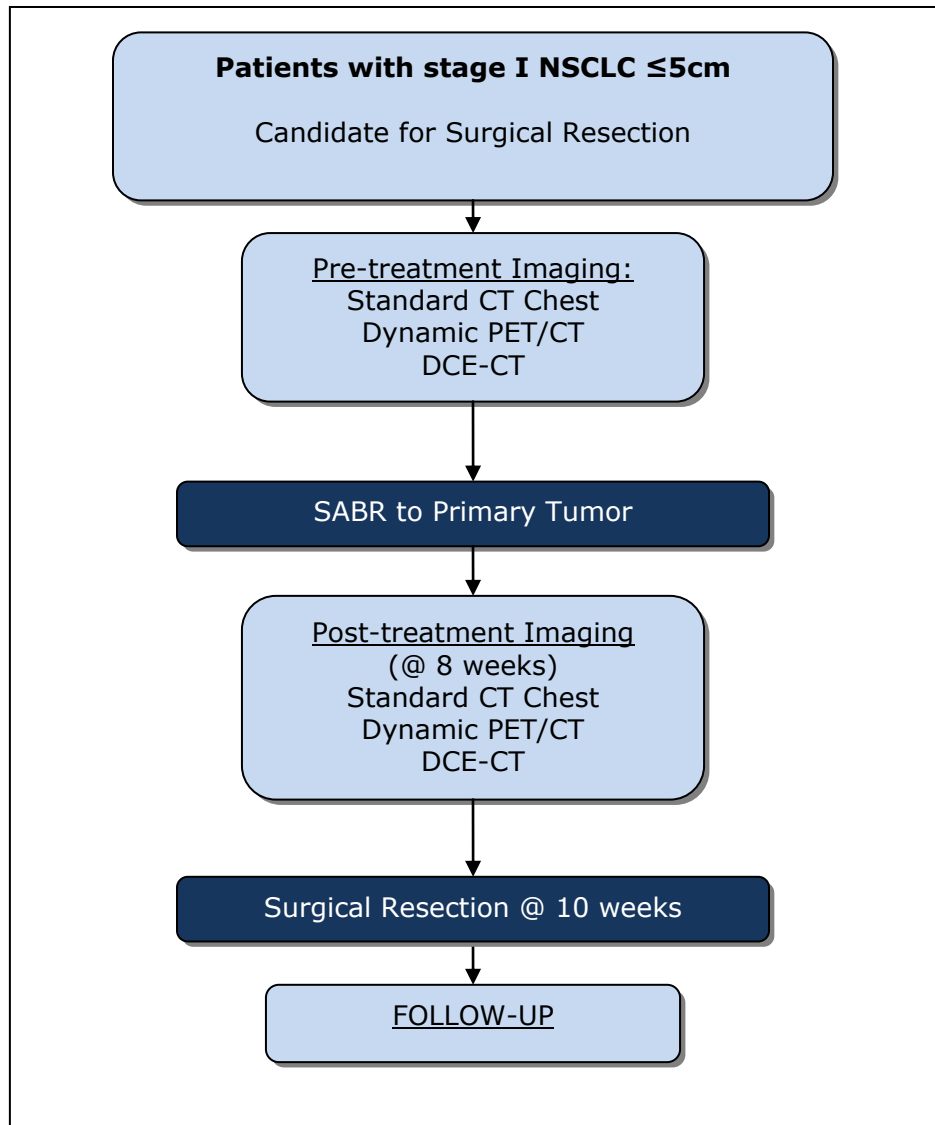

124  
125 **1.0 INTRODUCTION**  
126

127 Non-small cell lung cancer (NSCLC) is a major public health problem: it is the leading  
128 cause of cancer death in men and women in Canada,<sup>1</sup> the United States,<sup>2</sup> and worldwide.<sup>3</sup>  
129 Due to the aging population demographics in many developed countries, the incidence of  
130 NSCLC is expected to increase further in the coming decades.<sup>4-6</sup> Approximately 20% of  
131 NSCLC patients present with early stage disease (T1N0 or T2N0), defined as tumors up to  
132 5 cm in size without nodal metastases.<sup>7</sup>  
133

134 Despite the apparent localized nature of early-stage NSCLC, long-term outcomes are  
135 suboptimal. Anatomic lobectomy is the standard of care for the treatment of T1/T2N0  
136 NSCLC, and in the fittest patients who undergo lobectomy, 5-year survival is often 60-  
137 80%.<sup>8</sup> Survival is substantially lower in patients with comorbid conditions, <50% in some  
138 series.<sup>9</sup> For patients who are not candidates for lobectomy due to comorbidities, sublobar  
139 resection (segmentectomy or wedge resection) offers an alternative to anatomic  
140 lobectomy, but is associated with increased locoregional recurrence, and possibly inferior  
141 cancer-specific survival and overall survival, compared to lobectomy.<sup>10</sup>  
142

143 Historically, alternatives to surgery have proven unsatisfactory. Most patients who were  
144 not candidates for surgery were treated with conventional radiotherapy, delivered as doses  
145 of 50-60 Gy in 4-6 weeks, with relatively rudimentary tumor targeting techniques.  
146 Conventional radiotherapy was associated with high rates of local recurrence, often 30-  
147 40% or higher, with no improvement in long-term survival compared to observation  
148 alone.<sup>11,12</sup>  
149

150 In the past decade, the advent of stereotactic ablative radiotherapy (SABR, also known  
151 as “stereotactic body radiation therapy” [SBRT]) has provided a novel, promising treatment  
152 for patients with early-stage NSCLC.<sup>13-18</sup> SABR uses modern radiotherapy planning and  
153 targeting technologies to precisely deliver larger, ablative doses of radiotherapy (up to 60  
154 Gy in 3-8 fractions, which may equate to as much as 150 Gy delivered in conventional  
155 fractions<sup>19</sup>). SABR has been associated with high rates of local control, and population-  
156 based comparisons suggest that SABR improves overall survival relative to conventional  
157 radiotherapy.<sup>14,20</sup> Many studies report 3-year local control of approximately 90% after  
158 SABR, comparable to results obtained with anatomic lobectomy.<sup>8</sup> Retrospective  
159 unmatched comparisons, propensity-score matched studies, and modeling studies have  
160 suggested that SABR may provide an alternative to surgery, but with potentially lower  
161 acute morbidity.<sup>9,21-24</sup>  
162

163 Because of these promising outcomes, randomized trials comparing SABR with surgery  
164 were launched; however, all three such trials have closed due to poor accrual. A Dutch  
165 study, “Radiosurgery or Surgery for Operable Early Stage I Lung Cancer Study” (ROSEL)  
166 aimed to compare lobectomy vs. SABR for patients with T1N0 disease with a non-  
167 inferiority design, but closed after enrolling approximately 30 patients.<sup>25</sup> A large North  
168 American trial (ACOSOG4099/RTOG 1021) aimed to compare wedge resection (+/-  
169 brachytherapy) vs. SABR,<sup>26</sup> but was also unsuccessful in enrolling patients, as is often the

170 case with trials randomizing patients between surgical and non-surgical treatments. A third  
171 trial comparing SABR vs. lobectomy (NCT00840749) also recently closed in the United  
172 States, but accrual has been poor, and results are not expected in the near-term.<sup>27</sup>  
173

174 Despite the promising results reported with SABR, an important confounder has been  
175 the difficulty in assessing response after treatment.<sup>28</sup> Due to the very high doses of  
176 radiotherapy delivered, nearly all patients develop evidence of local radiation induced lung  
177 injury (RILI) on CT, which is often asymptomatic (Figure 1). This RILI can persist and  
178 evolve for years after treatment, and in some cases can be difficult to distinguish from  
179 recurrence. Theoretically, in a SABR patient with a large volume of RILI, a small local  
180 recurrence could be obscured and remain undetected for a long period of time; in  
181 comparison, after surgery, a small local recurrence would be relatively easy to detect  
182 against a background of normal lung tissue. As such, there is a risk of bias in reporting  
183 local control rates after SABR based on imaging criteria only, and some have argued that  
184 SABR local control has been overestimated.<sup>29</sup> To date, no reported studies have  
185 addressed the true pathological outcomes in patients treated with SABR.<sup>28</sup>  
186  
187

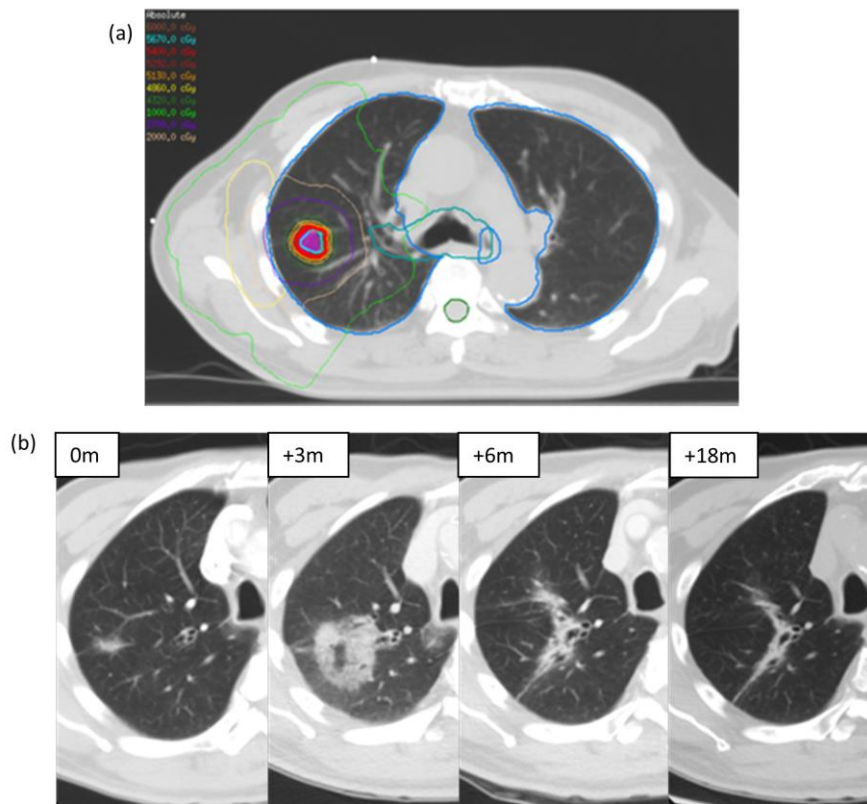

188 **Figure 1.** Radiological changes following SABR for an 85 year old gentleman with biopsy proven  
189 adenocarcinoma. This patient received 54 Gy in 3 fractions with the treatment plan shown in (a). Radiological  
190 changes are seen (b) where 0m indicates the pre-treatment lesion measuring 2.0 cm. At 3 months post-  
191 SABR, further enlargement of a ground-glass semi-solid opacity measuring 4.3 cm and at 6 months there is  
192 interval reduction in size and a decrease in ground-glass opacity, with ongoing reduction in size by 18  
193 months.  
194  
195

196 Distinguishing a recurrent tumor from lung injury on CT can be challenging, as  
197 radiation-induced lung injury and recurrent disease follow a similar time course. Lung  
198 fibrosis continues to evolve beyond two years post-treatment, during which time most local  
199 recurrences occur.<sup>30,31</sup> Historically, lung injury after traditional radiotherapy was  
200 characterized by straight edges conforming to treatment portals <sup>32</sup> (Figure 2); in contrast,  
201 the pattern of lung injury on CT following SABR can be mass-like, due to the conformal  
202 nature of SABR.<sup>30,33,34</sup>  
203

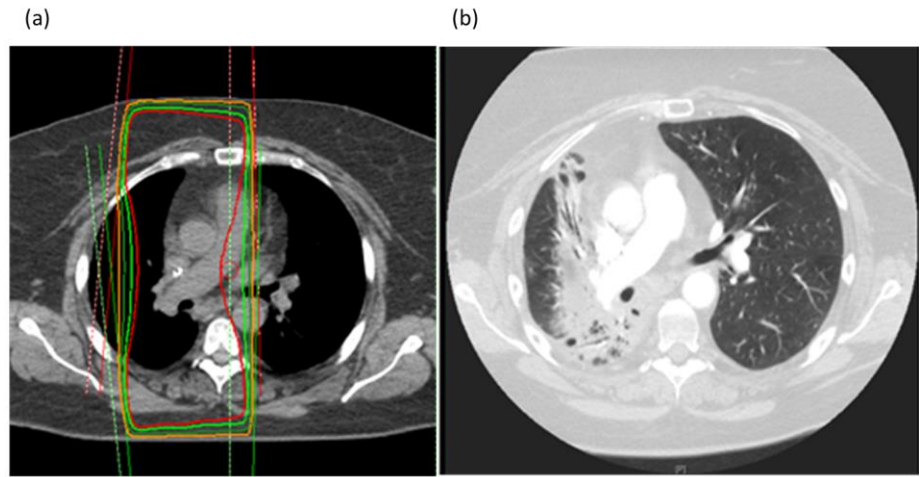

204 **Figure 2.** a) Radiation induced lung injury following a traditional anterior/posterior parallel opposed pair. b)  
205 The resulting benign injury conforms to the treatment portals and is easily distinguished by a straight line.  
206  
207

208 Accurate assessment of local recurrence post-SABR is of paramount importance. If a  
209 recurrence is misclassified as “benign fibrosis”, the window of opportunity for curative-intent  
210 salvage treatment could be missed. Alternatively, if fibrosis is misclassified as a  
211 “recurrence”, the patient would be exposed to unnecessary interventions and risks of  
212 morbidity, such as biopsy, imaging, chemotherapy, and even surgery.<sup>33,35-38</sup> As a growing  
213 number of fitter patients are being treated by SABR,<sup>39</sup> this clinical scenario will become  
214 more common.  
215

216 Imaging-based biomarkers of response post-SABR are urgently needed, and although  
217 several promising modalities have been identified in preliminary studies, no such studies  
218 have correlated imaging findings to pathological response at the microscopic level.<sup>28</sup> As a  
219 result, the gold-standard definition of “recurrence” varies across studies, and many  
220 studies use imaging-based definitions of recurrence, rather than pathologic  
221 confirmation. Such imaging-based definitions of the endpoint may introduce substantial  
222 bias and create a self-fulfilling prophesy: if imaging features are used to define  
223 “recurrence” (e.g. sequential growth of lesion) and then the same features are assessed  
224 to predict these “recurrences”, their performance may be artificially inflated. The  
225 majority of studies include only a small number of biopsy-proven recurrences (and  
226 resected recurrences are even more uncommon), with remainder of patients defined as  
227 recurrence an increase in tumor size on successive CT scans.<sup>40-42</sup>

228  
 229  
 230  
 231  
 232  
 233  
 234  
 235  
 236  
 237  
 238  
 239  
 240  
 241  
 242  
 243  
 244  
 245  
 246  
 247  
 248  
 249  
 250  
 251  
 252

Promising modalities for assessment of response after SABR include Dynamic Contrast-Enhanced Computed Tomography (DCE-CT), advanced CT-based image feature analysis, and dynamic functional imaging. DCE-CT may be useful as an imaging biomarker in SABR patients, as it allows for the characterization of the neovascularization patterns in tumors.<sup>43</sup> Preliminary studies have evaluated DCE-CT derived perfusion parameters in NSCLC patients undergoing radiotherapy or chemotherapy, and suggest that DCE-CT may be a valuable predictor of response, and may serve as a biomarker for tumor hypoxia.<sup>44-46</sup> CT-based quantitative image feature analysis extracts measurable information from within an image, such as intensities or densities, shape or morphology, or texture, the latter referring to a set of complex measurements which describe local brightness variation or the spatial arrangement of intensities in an image (Figure 3).<sup>47,48</sup> Preliminary data suggests that after SABR, image feature analysis may be able to distinguish recurrence from fibrosis much earlier than currently-used response metrics such as Response Criteria in Solid Tumors (RECIST).<sup>49-51</sup> FDG-PET has also been evaluated in preliminary studies for assessment of response after SABR, but the lack of true pathologic confirmation of recurrence (or lack thereof) in most studies precludes any definitive conclusions.<sup>28</sup> Dynamic PET is a novel approach that improves upon several issues inherent to the using the standard semi-quantitative maximum standardized uptake value ( $SUV_{max}$ ) as a biomarker. Rather than obtaining a single measure of glucose uptake 60 minutes after injection of the tracer (FDG), dynamic PET obtains several repeated measures of glucose uptake during and after injection, allowing for quantitative measurements of several parameters of glucose kinetics that may be predictive of outcomes and response to treatment.<sup>52-54</sup>

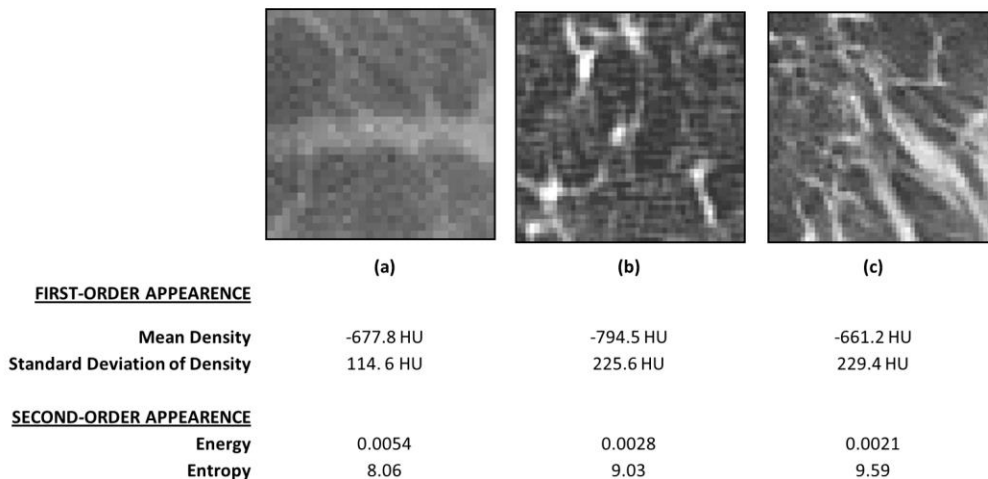

253  
 254  
 255  
 256  
 257  
 258  
 259

**Figure 4.** Sample lung images showing the variations in two first-order appearance measures (mean density and standard deviation of density [first-order texture analysis]) and two second-order appearance measures, energy and entropy. (a) and (c) have similar mean densities, but are better differentiated by the first and second-order texture measures. (b) and (c) have similar first-order texture values, but are better differentiated by the second order measures.



260  
261 The use of SABR as neoadjuvant therapy prior to surgery may provide a novel  
262 therapeutic opportunity. In oncology, the use of neoadjuvant radiotherapy or  
263 chemoradiotherapy prior to surgery has become widespread for several types of cancer,  
264 and in many instances improves local control and/or survival compared to surgery alone.<sup>55</sup>  
265 Neoadjuvant radiotherapy provides several theoretical advantages, including potentially  
266 decreasing the rate of positive margins, decreasing the size of the required resection, or by  
267 sterilizing the tumor to avoid seeding of circulating tumor cells during surgery.<sup>55</sup> In the  
268 setting of stage I NSCLC, the approach of neoadjuvant ablative treatment has been  
269 evaluated in the form of radiofrequency ablation (RFA); however, the high prevalence of  
270 viable tumor cells after RFA in this setting (62% of cases) has discouraged widespread  
271 adoption of this technique.<sup>56</sup> Combining SABR with surgery appears safe: at least 4 small  
272 studies have reported on patients who have undergone surgery for salvage in patients who  
273 have recurred after SABR.<sup>57-60</sup> Such surgery is generally well tolerated with a favorable  
274 toxicity profile, with only one patient sustaining a major toxicity (fistula requiring further  
275 surgery for correction).<sup>59</sup> To our knowledge, no study has employed an *a priori* planned  
276 combination of SABR + surgical resection with the goal of maximizing local control.  
277

278 The goal of this study is to evaluate a novel treatment approach: the combination of  
279 neoadjuvant SABR followed by surgical resection in patients with T1T2N0 NSCLC, in order  
280 to measure the true pathologic rates of local control after SABR, to develop new imaging  
281 biomarkers of response, and to assess clinical outcomes, including toxicity, relapse  
282 patterns, and survival.  
283  
284  
285  
286

287 **2.0 OBJECTIVES**

- 288
- 289 1. To assess the true pathological rate of complete primary tumor response after
- 290 SABR.
- 291
- 292 2. To evaluate imaging-based biomarkers of response using functional imaging
- 293 (dynamic FDG-PET), image texture analysis, and dynamic contrast enhanced CT
- 294 (DCE-CT), done pre- and post-SABR.
- 295
- 296 3. To correlate imaging findings with digital histopathology at the individual voxel level
- 297 using deformable co-registration.
- 298
- 299 4. To assess local recurrence, regional recurrence, distant recurrence, overall survival,
- 300 quality of life (QOL) and toxicity after a combined approach of SABR + surgical
- 301 resection for stage I NSCLC.
- 302
- 303 5. To assess the immunological effects of SABR on the NSCLC tumor micro-
- 304 environment
- 305
- 306

307 **3.0 STUDY DESIGN**

308

309 Single-arm cohort study.

310

311

312 **4.0 PATIENT SELECTION**

313

314 **4.1 Inclusion Criteria**

315

- 316
- Age 18 or older
  - Willing to provide informed consent
  - Histologically confirmed NSCLC
  - Tumor stage T1 or T2a ( $\leq 5$  cm)
  - No evidence of nodal disease (N0)
  - No evidence of distant metastases (M0)
  - ECOG performance status 0-2
  - Life expectancy  $>6$  months
  - adequate FEV1 for resection, defined as a predicted post-operative FEV1 of 30% or greater
- 326

327 **4.2 Exclusion Criteria**

328

- 329
- Serious medical comorbidities or other contraindications to radiotherapy or surgery
  - Prior history of lung cancer within 5 years
  - Prior thoracic radiation at any time
- 331

- 332 • Inability to attend full course of radiotherapy, surgery, or follow-up visits
- 333 • Contrast allergy
- 334 • Pregnant or lactating women
- 335

336 **5.0 PRE-TREATMENT EVALUATION**

- 337
- 338 • History and physical examination by a radiation oncologist and thoracic surgical
- 339 oncologist within 8 weeks prior to enrollment onto study
- 340
- 341 • Histological confirmation of non-small cell carcinoma
- 342
- 343 • Standard staging within 12 weeks prior to enrollment including
- 344 ○ CT chest and upper abdomen, acquired using a 6 mm slice thickness with
- 345 isotropic 3-D reconstruction around the tumor
- 346 ○ Whole body FDG-PET-CT scan
- 347 ○ CT head or MRI head
- 348
- 349 • Staging of the mediastinum:
- 350 ○ Mediastinoscopy is required for all patients, except for patients who have
- 351 both a peripheral T1 lesion and no FDG-avid regional nodes on PET/CT.
- 352
- 353 ○ Patients with regional nodes positive on PET/CT are eligible if surgical
- 354 staging does not reveal evidence of nodal disease (e.g.
- 355 EBUS/EUS/mediastinoscopy)
- 356
- 357 • Pulmonary function tests within 12 weeks of enrollment showing adequate FEV1 for
- 358 resection, with a predicted post-operative FEV1 of 30% or greater.
- 359
- 360 • Pregnancy test for women of child-bearing age
- 361
- 362 • Informed consent required
- 363
- 364
- 365

366 **6.0 TREATMENT PLAN**

367

368 **6.1 Pre-SABR and Pre-Surgical Imaging**

369

370 Standard of care pre-treatment staging includes a thin-slice CT chest, and whole-body  
371 static PET/CT, done prior to enrollment. Additional pre-treatment imaging will include DCE-  
372 CT and dynamic PET/CT of the primary tumor, acquired in a single visit.

373

374 All scans (thin-slice CT chest, DCE-CT, dynamic PET-CT) will be repeated 8 weeks (+/- 2  
375 weeks) post-SABR.

376

377 **6.1.1 Dynamic contrast enhanced CT chest**

378 The index lesion will be scanned repeatedly using 120 kVp, 50 mAs, 8 x 5 mm slices at  
379 intervals of 2.8 – 3.0 s for 3 min. Contrast (e.g. Visipaque 320) at a dosage of 0.7 ml/kg  
380 is injected at 4 ml/s through an antecubital vein after a delay of 6 s from start of  
381 scanning. The perfusion parameters derived from DCE-CT include blood flow (BF), blood  
382 volume (BV), mean transit time (MTT) and capillary permeability surface area product (PS,  
383 which measures the leakage rate of contrast from blood into the interstitial space).

384

385 **6.1.2 Dynamic 18-FDG-PET**

386 A dynamic 18-FDG PET will be acquired sequentially after single injection of FDG.  
387 Acquisition will include transmission scan to correct for photon attenuation. After the  
388 bolus of 18-FDG, a dynamic scan will begin with a duration of 60 min and a variable  
389 frame length (e.g. 6 x 5 s, 6x 10 s, 3 x 20 s, 5 x 30 s, 5 x 60 s, 8 x 150 s, and 6 x 300  
390 s).<sup>52</sup>

391

392

393 **6.2 Radiotherapy**

394  
395 SABR will be delivered as per a risk-adapted protocol, with the dose and number of  
396 fractions dependent on the size and location of the tumor.<sup>61,62</sup>

397  
398 Treatment can be delivered using static beams (either 3D-conformal radiotherapy or  
399 intensity-modulated) or rotational therapy (volumetric modulated arc therapy, or  
400 tomotherapy). Dose constraints are listed in Appendix 1 for the 3-, 5-, and 8-fraction  
401 regimens.  
402  
403

| <b>Tumor Size and Location</b>                    | <b>Total Dose (Gy)</b> | <b>Number of fractions</b> | <b>Dose per fraction (Gy)</b> | <b>Frequency</b> |
|---------------------------------------------------|------------------------|----------------------------|-------------------------------|------------------|
| Tumors 3 cm or less surrounded by lung parenchyma | 54                     | 3                          | 18                            | Every second day |
| Abutting chest wall or >3 cm                      | 55                     | 5                          | 11                            | Every second day |
| Within 2 cm of mediastinum or brachial plexus     | 60                     | 8                          | 7.5                           | Every second day |

404  
405  
406 **6.2.1 Immobilization, Imaging and Registration**

407  
408 Treatment will be set-up using reproducible positioning, verified using an on-line  
409 protocol, for all patients in this study. Immobilization may include a custom  
410 immobilization device, such as a vac-loc bag. All patients will undergo 4-D planning CT  
411 simulation.  
412

413 Physics will review the 4D-CT images and will perform the following quality assurance  
414 procedures indicated on the 4D-CT template designed specifically for SABR:  
415

- 416 1) Ensure all end inspiration (0%) tags exist and are in the right place. This ensures  
417 image integrity.  
418
- 419 2) If the quality of the 4D-CT images are not sufficient (determined by Physics), then  
420 planning will be performed on the fast helical CT or Untagged Average CT.  
421
- 422 3) Motion measurements in all 3 directions are performed.  
423  
424 a) If the motion is less than or equal to 7 mm and the good quality images exist,  
425 then treatment planning may be performed on the Untagged Average CT with the  
426 50% or 60% phase (End Expiration) and the 0% phase being fused to it.

- 427 b) If the motion is greater than 7 mm in any one direction, then respiratory-gated  
428 radiotherapy will be considered. In this case, treatment planning will be  
429 performed on a subset average CT dataset (usually labeled either 30%-60% Avg  
430 CT or 40%-70% Avg CT) generated by Physics. This is an average CT over the  
431 intended gated interval.  
432  
433

#### 434 6.2.2 Volume Definitions and Prescription

435  
436 The gross tumor volume (GTV) will be defined as the visible tumor on CT imaging +/- PET,  
437 and an internal GTV (iGTV) will be defined as the GTV from all phases of respiration, if  
438 gating is not used. No additional margin will be added for microscopic spread of disease. A  
439 Planning Target Volume (PTV) margin of 5 mm will be added Organs at risk visible in the  
440 planning CT scan will be contoured. Dose constraints are listed in Table 2.  
441

442 Doses are prescribed to approximately the 80% isodose line surrounding the PTV,  
443 resulting in a hotspot of 120-140%; the latter should fall within the iGTV. 95% of the PTV  
444 should be covered by the prescription dose, and 99% of the PTV should be covered by  
445 90% of the prescription dose. Several non-overlapping 6/10 MV beams (on the order of 7-  
446 11 beams) or 1-2 VMAT arcs combined possibly with a few non-coplanar beams should  
447 be utilized. Non-coplanar beams can be used to reduce 50% isodose volume for un-gated  
448 treatments.  
449

#### 450 6.2.3 Quality Assurance

451  
452 In order to ensure patient safety and effective treatment delivery, a robust quality  
453 assurance protocol is incorporated. The following requirements must be completed for  
454 each patient:  
455

- 456 • Prior to treatment, each patient must be discussed at quality assurance (QA)  
457 rounds.  
458
- 459 • All radiotherapy plans must meet target dose levels for organs at risk (Appendix 1).  
460 Prior to plan approval, the dose to each organ at risk must be verified by the  
461 physicist or treating physician. It is strongly recommended that dose constraints not  
462 be exceeded.  
463
- 464 • All dose delivery for intensity-modulated plans (including arc-based treatments) will  
465 be confirmed before treatment by physics staff.  
466
- 467 • Cone-beam CT will be used to verify patient positioning immediately prior to  
468 treatment. Ideally, direct tumour localization should be performed for stereotactic  
469 treatments of soft tissues. For gated SBRT treatments, direct tumour localization will  
470 be performed by matching the tumour position with the ROI defined by  
471 IGTV\_CBCT. This will be followed by a gated 2D-kV in the AP plane to verify the  
472 gating window. In the absence of direct tumour localization, reliable soft tissue

473 surrogates are recommended. A final CBCT may be done after completion of  
474 treatment.

### 475 476 **6.3 Surgery and Post-Surgical Specimen Processing**

477  
478  
479 Surgery will occur after the 2<sup>nd</sup> set of imaging, at 10 weeks following SABR (+/- 2 weeks), to  
480 allow sufficient time for a full pathological response. Surgery will consist of a lobectomy, or  
481 sublobar resection, and may employ either an open approach or a video-assisted  
482 thoracoscopic approach. Surgical sampling of the at-risk hilar and mediastinal nodes will be  
483 done at the time of resection.

#### 484 485 **6.3.1 Pathological Processing**

486 After resection, the tumor is oriented by the surgeon and submitted to the pathology lab.  
487 Upon arrival in the pathology lab, it will undergo gross examination in the standard manner.  
488 The specimen will be submitted in total for microscopic examination, as follows: For  
489 sublobar resections, the staple line will be removed and the specimen will then be serially  
490 sectioned every 3-4 mm. For lobectomy, after the bronchial margin specimen is removed,  
491 the index lesion (+/- approximately 2 cm margin) will be excised and serially sectioned  
492 every 3-4 mm. Depending on the size of the sections they will be submitted as is or will be  
493 bisected. The serially sectioned slices will be submitted sequentially and in total for paraffin  
494 processing, in the standard manner. Glass slides will be created in the standard manner.

495  
496 Digitized pathology slides will be co-registered with pre-treatment CT scans, and/or  
497 PET/CT, using a software method similar to that which we have previously developed for  
498 prostate cancer.<sup>63,64</sup> This approach uses deformable image registration techniques to  
499 reconstruct digitized pathology slides, computationally reconstituting them back into the 3D  
500 specimen context from which they were cut with 0.7 mm accuracy, and subsequently  
501 performs registration to in vivo prostate imaging with 1.1 mm accuracy.<sup>64</sup>

502  
503 Viability of any visible cells will be assessed by H&E uptake. Additionally stains for viability  
504 may be subsequently used in a retrospective manner to validate H&E findings.

### 505 506 507 **6.3 Adjuvant Treatment**

508  
509 Adjuvant chemotherapy will be delivered as per routine standard practice. Any patients with  
510 pathologic node-positive disease (N1, N2, or N3) will be referred for an opinion from a  
511 medical oncologist. For patients with N2 or N3 disease, adjuvant radiotherapy to the  
512 mediastinum may be considered as per institutional practice, provided there is minimal  
513 overlap with the SABR dose distribution.



516 **7.0 ADVERSE EVENTS**

517  
518 **7.1 Definitions**

519  
520 *Adverse Event (AE)* or reaction is any unfavorable and unintended sign (including an  
521 abnormal laboratory finding), symptom, or disease temporally associated with the use of  
522 a medical treatment or procedure that may or may *not* be considered related to the  
523 medical treatment or procedure.

524  
525 *Serious Adverse Event (SAE)* or reaction as defined in the ICH Guideline: Clinical  
526 Safety Data Management: Definitions and Standards for Expedited Reporting, E2A  
527 Section IIB includes any untoward medical occurrence that at any dose:

- 528  
529
- Results in death
  - Is life-threatening (refers to an event in which the patient was at risk of death at the time of the event; it does not refer to an event which hypothetically might have caused death if it were more severe.)
  - Results in persistent or significant disability/incapacity
  - Requires in-patient hospitalization or prolongation of existing hospitalization
  - Is a congenital anomaly/birth defect
- 530  
531  
532  
533  
534  
535  
536

537 Important medical events that may not be immediately life-threatening or result in death  
538 or hospitalization may be considered a serious adverse event, when, based upon  
539 medical and scientific judgment, they may jeopardize the patient or may require  
540 intervention to prevent one of the other outcomes listed in the definition above.

541 *Unexpected* adverse reaction is one that the nature and severity is not consistent  
542 with the applicable product information (e.g., Investigator's Brochure or Product  
543 Monograph, described in the REB/IRB approved research protocol or informed  
544 consent document), or occurs with more than expected frequency.

545  
546 **7.2 Causality (attribution)**

547  
548 An adverse event or reaction is considered **related** to the research intervention if there  
549 is a reasonable possibility that the reaction or event may have been caused by the  
550 research intervention (i.e. a causal relationship between the reaction and the research  
551 intervention cannot be ruled out by the investigator(s)).

552  
553 The relationship of an AE to the study treatment (causality) will be described using the  
554 following definitions:

555  
556 **Unrelated:** Any adverse event for which there is evidence that an alternative  
557 etiology exists or for which no timely relationship exists to the  
558 administration of the study treatment and the adverse event does not  
559 follow any previously documented pattern. The adverse event, after

560 careful consideration by the investigator, is clearly and incontrovertibly  
561 due to causes other than the intervention.

562  
563 **Unlikely:** Any adverse event for which the time relationship between the study  
564 treatment and the event suggests that a causal relationship is unlikely  
565 and/or the event is more likely due to the subject's clinical condition or  
566 other therapies concomitantly administered to the subject.  
567

568 **Possible:** Any adverse event occurring in a timely manner after the  
569 administration of the study treatment that follows a known pattern to  
570 the intervention and for which no other explanation is known. The  
571 adverse event, after careful consideration by the investigator, is  
572 considered to be unlikely related but cannot be ruled out with certainty.  
573

574 **Probable:** Any adverse event occurring in a timely manner after the  
575 administration of the study treatment that follows a known pattern to  
576 the intervention and for which no other explanation is known. The  
577 adverse event, after careful consideration by the investigator, is  
578 believed with a high degree of certainty to be related to the  
579 intervention.  
580

581 **Definitely Related:** Any adverse event occurring within a timely manner after  
582 administration of the study treatment that is a known sequela of the  
583 intervention and follows a previously documented pattern but for which  
584 no other explanation is known. The adverse event is believed by the  
585 investigator to be incontrovertibly related to the intervention.  
586

### 587 7.3 Severity

588  
589 The severity of adverse events will be evaluated using the Common Terminology  
590 Criteria for Adverse Events (CTCAE) v4.0 grading scale (see <http://ctep.cancer.gov>).  
591

592 Grade 1: Mild  
593 Grade 2: Moderate  
594 Grade 3: Severe  
595 Grade 4: Life-threatening or disabling  
596 Grade 5: Death  
597

598 **Note:** The term "severe" is a measure of intensity: thus a severe adverse event is not  
599 necessarily **serious**. For example, nausea of several hours' duration may be rated as  
600 severe, but may not be clinically serious.  
601

### 602 7.4 Immediately Reportable Adverse Events

603  
604 **Any grade 4 or 5 adverse reaction that is definitely, probably, or possibly the**  
605 **result of protocol treatment must be verbally reported to the Principal**  
606 **Investigator and Co-Investigators within 24 hours of discovery, and Office of**  
607 **Research Ethics as outlined below.**

608  
609 Events or Outcomes Not Qualifying as SAEs

610  
611 Any sign, symptom, diagnosis, illness, and/or clinical laboratory abnormality that can be  
612 linked to the disease under study or disease progression and is not possibly attributable  
613 to study treatment, are not reported as SAEs even though such event or outcome may  
614 meet the definition of SAE.

615  
616 Events that are exempt from reporting as SAEs include:

- 617
- 618 • Events emerging during the study that is part of the natural progression of the
  - 619 underlying cancer (including disease-related deaths) unless more severe than expected
  - 620 or not possibly attributable to study treatment. For example, hospitalization for the
  - 621 evaluation or treatment of signs and symptoms of disease progression that are not
  - 622 possibly attributable to study treatment will not be reported as an SAE.
  - 623 • Serious Adverse Events that occur more than 30 days after the end of study treatment
  - 624 that are judged by the investigator to be unrelated to study treatment.

625  
626 All **serious, unexpected** adverse events or reactions **regardless of causality** for  
627 subjects enrolled at the local site must be reported to the Office of Research Ethics,  
628 within **7** days of discovery of the event or reaction through the Local Adverse Events  
629 Report.

630  
631  
632 The Principal Investigator should also comply with the applicable regulatory  
633 requirement(s) related to the reporting of unexpected serious adverse drug reactions to  
634 the regulatory authority (ies).

635  
636  
637 **8.0 SUBJECT DISCONTINUATION / WITHDRAWAL**

638  
639 Subjects may voluntarily discontinue participation in the study at any time. If a subject is  
640 removed from the study, the clinical and laboratory evaluations that would have been  
641 performed at the end of the study should be obtained. If a subject is removed because  
642 of an adverse event, they should remain under medical observation as long as deemed  
643 appropriate by the treating physician.

644

645  
646  
647  
648

## **9.0 FOLLOW-UP EVALUATION AND ASSESSMENT OF EFFICACY**

The follow-up schedule is as follows:

|                                                            | <b>Before Entry</b> | <b>Pre-SABR</b> | <b>8 weeks post-SABR*</b> | <b>3 Mo. Post-Surgery</b> | <b>q6 monthly for 2 years then annually until year 5 (from date of surgery)**</b> |
|------------------------------------------------------------|---------------------|-----------------|---------------------------|---------------------------|-----------------------------------------------------------------------------------|
| History and Physical                                       | X                   |                 |                           | X                         | X                                                                                 |
| CT chest with isotropic 6 mm slice thickness through tumor | X                   |                 | X                         |                           |                                                                                   |
| Staging FDG-PET-CT scan                                    | X                   |                 |                           |                           |                                                                                   |
| CT head or MRI head                                        | X                   |                 |                           |                           |                                                                                   |
| Pulmonary function tests                                   | X                   |                 | X                         |                           |                                                                                   |
| Pregnancy test for women of child-bearing age              | X                   |                 |                           |                           |                                                                                   |
| Biomarker Imaging: DCE-CT<br>Dynamic FDG PET               |                     | X               | X                         |                           |                                                                                   |
| Toxicity Scoring and QOL                                   | X                   |                 | X                         | X                         | X***                                                                              |
| Follow-up CT chest and upper abdomen                       |                     |                 |                           |                           | X                                                                                 |

649  
650  
651  
652  
653  
654  
655  
656  
657

\* +/- 2 weeks

\*\*Follow-up appointments occurring 6 months after surgery and beyond may be conducted by the thoracic surgeon. Data will be submitted to the LRCP Clinical Research Unit by the Thoracics Clinical Research Unit.

\*\*\*toxicity scoring will stop at one year, unless ongoing or new toxicity is related to treatment and grade 3 or higher. QOL scoring will stop at 2 years

## 10.0 Statistical Considerations and Sample Size Calculation

### 10.1 Analysis Plan

#### *Primary Endpoint*

The primary endpoint of this study will be the percentage of patients who exhibit a lack of viable tumor after surgical resection (e.g. a pathologic complete response [pCR]), which will be reported as the patients with a complete response, divided by the total number of patients undergoing resection, with a 95% confidence interval (CI).

#### *Secondary Endpoints*

Logistic regression will be used to evaluate the predictive value of the novel imaging biomarkers, with the dependent variable as pathologic outcome (complete response vs. non-complete response). From DCE-CT, changes in BF, BV, MTT and PS will be examined as independent predictors. From PET studies, parameters of FDG uptake (e.g. SUVmax) will be examined as independent predictors. For CT texture analysis, factors tested will include several first-order and second-order metrics; for dynamic PET/CT, kinetic analyses will be associated with pathologic response and long-term oncologic outcomes.

Local recurrence will be defined as any new tumor growth >5 mm within the involved lobe (post-sublobar resection) or at the resection margins (post-lobectomy). Regional recurrence will be defined as any recurrence in the hilar, mediastinal, or supraclavicular nodes. Distant recurrence will be defined as the development of hematogenous metastases. Time-to-event oncologic outcomes (overall survival, time to local-, regional- and distant- recurrence) will be measured from the date of enrollment and calculated using the Kaplan-Meier method.

Toxicity will be scored as per the Common Terminology Criteria for Adverse Events (CTCAE) v4.0 grading scale (see <http://ctep.cancer.gov>), as described in Section 7.

QOL will be measured using the Functional Assessment of Cancer Therapy-Trial Outcome Index (TOI) for Lung Cancer, which is measured using the data from the FACT-Lung (FACT-L) questionnaire completed by patients. The FACT-TOI is a summary score derived from the FACT-L and is composed of 21 items, including physical well-being, functional well-being, and lung-cancer subscale questions).

### 10.2 Data Safety Monitoring Committee

Safety will be assessed by the data safety and monitoring committee (DSMC). The DSMC will meet semi-annually after study initiation to review toxicity outcomes. If any grade 5 toxicity is reported, the DSMC will review the case notes to determine if such toxicity is related to treatment. If the DSMC deems that toxicity rates are excessive (e.g. >5% grade 5 toxicity), then the DSMC can, at its discretion, recommend cessation or modification of the trial.

704 In addition, after 10 patients have been accrued and completed the surgery, an interim  
705 review of toxicity will be undertaken separately by the study team and DSMC; if these are  
706 deemed excessive, the trial may be modified.

707

### 708 10.3 Sample Size Calculation

709

710 The sample size is calculated to provide a true estimate of the rate of true pCR rate  
711 after SABR, within a 95% confidence interval (CI) of  $\pm 10$  percentage points. It is  
712 estimated that the rate of true pCR after SABR will be 90%. In order to restrict the 95%  
713 CI to  $\pm 10\%$ , including an 8% dropout rate, a total of 40 patients would be required.<sup>65</sup>

714

715

## 716 11.0 ETHICAL CONSIDERATIONS

717

718 The Principal Investigator will obtain ethical approval and clinical trial authorization by  
719 competent authorities according to local laws and regulations.

720

### 721 11.1 Institutional Review Board (IRB) / Research Ethics Board (REB)

722

723 The protocol (and any amendments), the informed consent form, and any other written  
724 information to be given to subjects will be reviewed and approved by a properly  
725 constituted Institutional Review Board (IRB)/Research Ethics Board (REB), operating in  
726 accordance with the current federal regulations (e.g., Canadian Food and Drug  
727 Regulations (C.05.001); US Code of Federal Regulations (21CFR part 56)), ICH GCP  
728 and local regulatory requirements. A letter to the investigator documenting the date of  
729 the approval of the protocol and informed consent form will be obtained from the  
730 IRB/REB prior to initiating the study. Any institution opening this study will obtain REB  
731 IRB/REB approval prior to local initiation.

732

### 733 11.2 Informed Consent

734

735 The written informed consent form to be provided to potential study subjects should be  
736 approved by the IRB/REB and adhere to ICH GCP and the ethical principles that have  
737 their origin in the Declaration of Helsinki. The investigator is responsible for obtaining  
738 written informed consent from each subject, or if the subject is unable to provide  
739 informed consent, the subject's legally acceptable representative, prior to beginning any  
740 study procedures and treatment(s). The investigator should inform the subject, or the  
741 subject's legally acceptable representative, of all aspects of the study, including the  
742 potential risks and benefits involved. The subject should be given ample time and  
743 opportunity to ask questions prior to deciding about participating in the study and be  
744 informed that participation in the study is voluntary and that they are completely free to  
745 refuse to enter the study or to withdraw from it at any time, for any reason.

746

747 The informed consent must be signed and dated by the subject, or the subject's legally  
748 acceptable representative, and by the person who conducted the informed consent  
749 discussion. A copy of the signed and dated written informed consent form should be

750 given to the subject or the subject's legally acceptable representative. The process of  
751 obtaining informed consent should be documented in the patient source documents.  
752

753

### 754 11.3 Confidentiality of Subject Records

755

756 The names and personal information of study participants will be held in strict  
757 confidence. All study records (CRFS, safety reports, correspondence, etc.) will only  
758 identify the subject by initials and the assigned study identification number. The data  
759 coordinator will maintain a confidential subject identification list (Master List) during the  
760 course of the study. Access to confidential information (i.e., source documents and  
761 patient records) is only permitted for direct subject management and for those involved  
762 in monitoring the conduct of the study (i.e., Sponsors, CRO's, representatives of the  
763 IRB/REB, and regulatory agencies). The subject's name will not be used in any public  
764 report of the study.  
765

### 766 11.4 Registration Procedure

767

768 Please call the data co-ordinator at the LRCP to notify of potential eligibility. Eligibility  
769 requirements, registration form, and signed letter of information are to be faxed to the co-  
770 ordinator at the LRCP. To complete the registration you must call the data co-ordinator  
771 immediately after faxing. If the patient is eligible the co-ordinator will confirm and provide a  
772 patient ID number.  
773

774

## 775 **12.0 BIOMARKER STUDIES**

776

777 This patient population offers a great opportunity to assess the immunological effects of  
778 SABR on the NSCLC tumor micro-environment. This could also provide clues for the  
779 best future immunotherapy combinations. In collaboration with researchers at VU  
780 University Medical Center in Amsterdam Netherlands, multiplex (7-parameter) ICH will  
781 be performed on pre and post-treatment tumor biopsies.  
782

### 783 Required Samples:

- 784 1) Core biopsy pre-treatment for all patients (10 slides, unstained, at 5um thickness)
- 785 2) Post-radiotherapy tumor tissue at resection and slides from the hilar lymph  
786 nodes, if possible. (10 slides, unstained, at 5um thickness)  
787

### 788 Planned Analyses:

789

- 790 1) Multiplex (7-parameter) ICH with immune parameters

791

- Panels:

792

- Tumor panel: IDO, PDL1, PDL2, HCA2, HC10, B2m

793

- T-cell panels: CD3, CD8, FoxP3, TBet, Ki67, GranzymeB; and

794

- CD3, CD8, PD1, Tim3, Lag3, GranzymeB

795  
796

- APC Panels: CD14, CD163, CD83, CD1a, PDL1, CD83; and CD14, CD33, HLA-DR, CD11b, CD15, Arginase



## References

- 797  
798  
799 1. Canadian Cancer Society's Advisory Committee on Cancer Statistics.  
800 Canadian Cancer Statistics 2013. Toronto, ON: Canadian Cancer Society, 2013  
801 2. American Cancer Society. Cancer Facts & Figures 2013. Atlanta: American  
802 Cancer Society, 2013  
803 3. Parkin DM, Bray F, Ferlay J, et al: Global Cancer Statistics, 2002. CA: A  
804 Cancer Journal for Clinicians 55:74-108, 2005  
805 4. Audisio RA, Zbar AP, Jaklitsch MT: Surgical Management of Oncogeriatric  
806 Patients. Journal of clinical oncology 25:1924-1929, 2007  
807 5. Edwards BK, Howe HL, Ries LA, et al: Annual report to the nation on the  
808 status of cancer, 1973-1999, featuring implications of age and aging on U.S. cancer  
809 burden. Cancer 94:2766-92, 2002  
810 6. Sigel K, Bonomi M, Packer S, et al: Effect of age on survival of clinical stage I  
811 non-small-cell lung cancer. Ann.Surg.Oncol. 16:1912-1917, 2009  
812 7. Goldstraw P, Crowley J, Chansky K, et al: The IASLC Lung Cancer Staging  
813 Project: proposals for the revision of the TNM stage groupings in the forthcoming (seventh)  
814 edition of the TNM Classification of malignant tumours. Journal of thoracic oncology 2:706-  
815 14, 2007  
816 8. Nguyen NP, Garland L, Welsh J, et al: Can stereotactic fractionated radiation  
817 therapy become the standard of care for early stage non-small cell lung carcinoma. Cancer  
818 Treatment Reviews 34:719-727, 2008  
819 9. Palma D, Lagerwaard F, Rodrigues G, et al: Curative treatment of Stage I  
820 non-small-cell lung cancer in patients with severe COPD: stereotactic radiotherapy  
821 outcomes and systematic review. International journal of radiation oncology, biology,  
822 physics 82:1149-56, 2012  
823 10. Ginsberg RJ, Rubinstein LV: Randomized trial of lobectomy versus limited  
824 resection for T1 N0 non-small cell lung cancer. The Annals of thoracic surgery 60:615-623,  
825 1995  
826 11. Qiao X, Tullgren O, Lax I, et al: The role of radiotherapy in treatment of stage  
827 I non-small cell lung cancer. Lung Cancer 41:1-11, 2003  
828 12. Wisnivesky JP, Bonomi M, Henschke C, et al: Radiation therapy for the  
829 treatment of unresected stage I-II non-small cell lung cancer. Chest 128:1461-7, 2005  
830 13. Palma D, Senan S: Stereotactic radiation therapy: changing treatment  
831 paradigms for stage I nonsmall cell lung cancer. Curr Opin Oncol, 2010  
832 14. Palma D, Visser O, Lagerwaard FJ, et al: Impact of Introducing Stereotactic  
833 Lung Radiotherapy for Elderly Patients With Stage I Non-Small-Cell Lung Cancer: A  
834 Population-Based Time-Trend Analysis. Journal of clinical oncology 28:5153-9, 2010  
835 15. Palma DA, Senan S: Early-stage non-small cell lung cancer in elderly  
836 patients: should stereotactic radiation therapy be the standard of care? International journal  
837 of radiation oncology, biology, physics 84:1058-9, 2012  
838 16. Palma DA, Senan S: Improving Outcomes for High-Risk Patients With Early-  
839 Stage Non-Small-Cell Lung Cancer: Insights from Population-Based Data and the Role of  
840 Stereotactic Ablative Radiotherapy. Clin Lung Cancer, 2012

- 841 17. Senth S, Lagerwaard FJ, Haasbeek CJ, et al: Patterns of disease  
842 recurrence after stereotactic ablative radiotherapy for early stage non-small-cell lung  
843 cancer: a retrospective analysis. *Lancet Oncol.* 13:802-9, 2012
- 844 18. Timmerman R, Paulus R, Galvin J, et al: Stereotactic body radiation therapy  
845 for inoperable early stage lung cancer. *JAMA* 303:1070-1076, 2010
- 846 19. Fowler JF, Tome WA, Fenwick JD, et al: A challenge to traditional radiation  
847 oncology. *Int J Radiat Oncol Biol Phys* 60:1241 - 1256, 2004
- 848 20. Haasbeek C, Palma D, Visser O, et al: Survival Improvement for Elderly  
849 patients presenting with Early Stage Lung Cancer in the Netherlands between 2001 and  
850 2009. *Annals of Oncology*:May 2 [epub ahead of print], 2012
- 851 21. Grills IS, Mangona VS, Welsh R, et al: Outcomes after stereotactic lung  
852 radiotherapy or wedge resection for stage I non-small-cell lung cancer. *Journal of clinical*  
853 *oncology* 28:928-935, 2010
- 854 22. Louie AV, Rodrigues G, Hannouf M, et al: Stereotactic body radiotherapy  
855 versus surgery for stage I NSCLC: a Markov model-based decision analysis. *Int.J*  
856 *Radiat.Oncol Biol.Phys.* accepted, in press, 2010
- 857 23. Palma D, Visser O, Lagerwaard FJ, et al: Treatment of stage I NSCLC in  
858 elderly patients: A population-based matched-pair comparison of stereotactic radiotherapy  
859 versus surgery. *Radiotherapy and Oncology* 101:240-244, 2011
- 860 24. Versteegen NE, Oosterhuis JWA, Palma DA, et al: Stage I-II non-small cell  
861 lung cancer treated using either stereotactic ablative radiotherapy (SABR) or lobectomy by  
862 video-assisted thoracoscopic surgery (VATS): Outcomes of a propensity score-matched  
863 analysis. *Ann Oncol*:Feb 20 Epub ahead of print, 2013
- 864 25. A Randomized Clinical Trial of Either Surgery or Stereotactic Radiotherapy  
865 for Early Stage (IA) Lung Cancer (ROSEL). <http://clinicaltrials.gov/ct2/show/NCT00687986>  
866 Accessed:
- 867 26. A Randomized Phase III Study of Sublobar Resection (+/- Brachytherapy)  
868 versus Stereotactic Body Radiation Therapy in High Risk Patients with Stage I Non-Small  
869 Cell Lung Cancer (NSCLC).  
870 <http://www.rtog.org/ClinicalTrials/ProtocolTable/StudyDetails.aspx?study=1021> Accessed:  
871 2013
- 872 27. International Randomized Study to Compare CyberKnife Stereotactic  
873 Radiotherapy With Surgical Resection In Stage I Non-small Cell Lung Cancer (STARS).  
874 <http://clinicaltrials.gov/ct2/show/NCT00840749> Accessed:
- 875 28. Huang K, Dahele M, Senan S, et al: Radiographic changes after lung  
876 stereotactic ablative radiotherapy (SABR)--can we distinguish recurrence from fibrosis? A  
877 systematic review of the literature. *Radiother Oncol* 102:335-42, 2012
- 878 29. Van Schil PE: Results of surgery for lung cancer compared with  
879 radiotherapy: do we speak the same language. *Journal of thoracic oncology* 8:129-30,  
880 2013
- 881 30. Dahele M, Palma D, Lagerwaard F, et al: Radiological Changes After  
882 Stereotactic Radiotherapy for Stage I Lung Cancer. *Journal of thoracic oncology* 6:1221-8,  
883 2011
- 884 31. Senth S, Lagerwaard FJ, Haasbeek CJ, et al: Patterns of disease  
885 recurrence after stereotactic ablative radiotherapy for early stage non-small-cell lung  
886 cancer: a retrospective analysis. *The lancet oncology* 13:802-9, 2012

- 887 32. Libshitz HI, Shuman LS: Radiation-induced pulmonary change: CT findings.  
888 Journal of computer assisted tomography 8:15-9, 1984
- 889 33. Takeda A, Kunieda E, Takeda T, et al: Possible misinterpretation of  
890 demarcated solid patterns of radiation fibrosis on CT scans as tumor recurrence in patients  
891 receiving hypofractionated stereotactic radiotherapy for lung cancer. International journal of  
892 radiation oncology, biology, physics 70:1057-65, 2008
- 893 34. Matsuo Y, Nagata Y, Mizowaki T, et al: Evaluation of mass-like consolidation  
894 after stereotactic body radiation therapy for lung tumors. International journal of clinical  
895 oncology / Japan Society of Clinical Oncology 12:356-62, 2007
- 896 35. Wiener RS, Schwartz LM, Woloshin S, et al: Population-based risk for  
897 complications after transthoracic needle lung biopsy of a pulmonary nodule: an analysis of  
898 discharge records. Annals of internal medicine 155:137-44, 2011
- 899 36. Gupta S, Wallace MJ, Cardella JF, et al: Quality improvement guidelines for  
900 percutaneous needle biopsy. Journal of vascular and interventional radiology : JVIR  
901 21:969-75, 2010
- 902 37. Singhvi M, Lee P: Illustrative cases of false positive biopsies after  
903 stereotactic body radiation therapy for lung cancer based on abnormal FDG-PET-CT  
904 imaging. BMJ case reports 2013, 2013
- 905 38. Stauder MC, Rooney JW, Neben-Wittich MA, et al: Late tumor  
906 pseudoprogression followed by complete remission after lung stereotactic ablative  
907 radiotherapy. Radiation oncology 8:167, 2013
- 908 39. Pan H, Simpson DR, Mell LK, et al: A survey of stereotactic body  
909 radiotherapy use in the United States. Cancer, 2011
- 910 40. Takeda A, Kunieda E, Fujii H, et al: Evaluation for local failure by 18F-FDG  
911 PET/CT in comparison with CT findings after stereotactic body radiotherapy (SBRT) for  
912 localized non-small-cell lung cancer. Lung Cancer 79:248-53, 2013
- 913 41. Nakajima N, Sugawara Y, Kataoka M, et al: Differentiation of tumor  
914 recurrence from radiation-induced pulmonary fibrosis after stereotactic ablative  
915 radiotherapy for lung cancer: characterization of 18F-FDG PET/CT findings. Ann Nucl Med  
916 27:261-70, 2013
- 917 42. Bollineni VR, Widder J, Pruijm J, et al: Residual (1)(8)F-FDG-PET uptake 12  
918 weeks after stereotactic ablative radiotherapy for stage I non-small-cell lung cancer  
919 predicts local control. International journal of radiation oncology, biology, physics 83:e551-  
920 5, 2012
- 921 43. Lee TY, Purdie TG, Stewart E: CT imaging of angiogenesis. Q J Nucl Med  
922 47:171-87, 2003
- 923 44. Hwang SH, Yoo MR, Park CH, et al: Dynamic contrast-enhanced CT to  
924 assess metabolic response in patients with advanced non-small cell lung cancer and stable  
925 disease after chemotherapy or chemoradiotherapy. Eur Radiol 23:1573-81, 2013
- 926 45. Mandeville HC, Ng QS, Daley FM, et al: Operable non-small cell lung cancer:  
927 correlation of volumetric helical dynamic contrast-enhanced CT parameters with  
928 immunohistochemical markers of tumor hypoxia. Radiology 264:581-9, 2012
- 929 46. Lazanyi KS, Abramyuk A, Wolf G, et al: Usefulness of dynamic contrast  
930 enhanced computed tomography in patients with non-small-cell lung cancer scheduled for  
931 radiation therapy. Lung Cancer 70:280-5, 2010

932 47. Russ JC: The Image Processing Handbook, Fifth Edition, Taylor & Francis,  
933 2006

934 48. IEEE Standard Glossary of Image Processing and Pattern Recognition  
935 Terminology. IEEE Std 610.4-1990:0\_1, 1990

936 49. Mattonen SA, Palma DA, Haasbeek CJ, et al: Distinguishing radiation  
937 fibrosis from tumour recurrence after stereotactic ablative radiotherapy (SABR) for lung  
938 cancer: a quantitative analysis of CT density changes. *Acta Oncol* 52:910-8, 2013

939 50. Mattonen SA, Palma DA, Haasbeek CJ, et al: CT image feature analysis in  
940 distinguishing radiation fibrosis from tumour recurrence after stereotactic ablative  
941 radiotherapy (SABR) for lung cancer: a preliminary study. *SPIE Medical Imaging 2013:  
942 Biomedical Applications in Molecular, Structural, and Functional Imaging Proceedings  
943 8672*, 2013

944 51. Mattonen SA, Palma DA, Haasbeek CJA, et al: Assessment of response  
945 after stereotactic ablative radiotherapy (SABR) for lung cancer: can advanced CT image  
946 feature analysis predict recurrence?, Canadian Cancer Research Conference. Toronto,  
947 Canada, 2013

948 52. Hoekstra CJ, Hoekstra OS, Stroobants SG, et al: Methods to Monitor  
949 Response to Chemotherapy in Non-Small Cell Lung Cancer with 18F-FDG PET. *Journal of  
950 Nuclear Medicine* 43:1304-1309, 2002

951 53. Dimitrakopoulou-Strauss A, Pan L, Strauss LG: Quantitative approaches of  
952 dynamic FDG-PET and PET/CT studies (dPET/CT) for the evaluation of oncological  
953 patients. *Cancer Imaging* 12:283-9, 2012

954 54. Kristian A, Revheim ME, Qu H, et al: Dynamic (18)F-FDG-PET for  
955 monitoring treatment effect following anti-angiogenic therapy in triple-negative breast  
956 cancer xenografts. *Acta Oncol* 52:1566-72, 2013

957 55. Tanvetyanon T, Clark JI, Campbell SC, et al: Neoadjuvant therapy: an  
958 emerging concept in oncology. *South Med J* 98:338-44, 2005

959 56. Schneider T, Reuss D, Warth A, et al: The efficacy of bipolar and multipolar  
960 radiofrequency ablation of lung neoplasms - results of an ablate and resect study. *Eur J  
961 Cardiothorac Surg* 39:968-73, 2011

962 57. Chen F, Matsuo Y, Yoshizawa A, et al: Salvage lung resection for non-small  
963 cell lung cancer after stereotactic body radiotherapy in initially operable patients. *J Thorac  
964 Oncol* 5:1999-2002, 2010

965 58. Hamamoto Y, Kataoka M, Yamashita M, et al: Lung-cancer related chest  
966 events detected by periodical follow-up CT after stereotactic body radiotherapy for stage I  
967 primary lung cancer: retrospective analysis of incidence of lung-cancer related chest  
968 events and outcomes of salvage treatment. *Japanese journal of radiology* 30:671-675,  
969 2012

970 59. Neri S, Takahashi Y, Terashi T, et al: Surgical treatment of local recurrence  
971 after stereotactic body radiotherapy for primary and metastatic lung cancers. *J  
972 Thorac.Oncol* 5:2003-7, 2010

973 60. Allibhai Z, Cho BCJ, Taremi M, et al: Surgical salvage following stereotactic  
974 body radiotherapy for early-stage NSCLC. *European Respiratory Journal* 39:1039-1042,  
975 2012

976 61. Lagerwaard FJ, Haasbeek CJ, Smit EF, et al: Outcomes of risk-adapted  
977 fractionated stereotactic radiotherapy for stage I non-small-cell lung cancer. International  
978 journal of radiation oncology, biology, physics 70:685-92, 2008

979 62. Palma DA, Haasbeek CJ, Rodrigues GB, et al: Stereotactic ablative  
980 radiotherapy for comprehensive treatment of oligometastatic tumors (SABR-COMET):  
981 study protocol for a randomized phase II trial. BMC Cancer 12:305, 2012

982 63. Ward AD, Crukley C, McKenzie CA, et al: Prostate: registration of digital  
983 histopathologic images to in vivo MR images acquired by using endorectal receive coil.  
984 Radiology 263:856-64, 2012

985 64. Gibson E, Crukley C, Gaed M, et al: Registration of prostate histology  
986 images to ex vivo MR images via strand-shaped fiducials. J Magn Reson Imaging 36:1402-  
987 12, 2012

988 65. Newcombe RG: Two-sided confidence intervals for the single proportion:  
989 comparison of seven methods. Stat Med 17:857-72, 1998

990 66. Timmerman RD: An Overview of Hypofractionation and Introduction to This  
991 Issue of Seminars in Radiation Oncology. Seminars in Radiation Oncology 18:215-222,  
992 2008

993 67. Hurkmans CW, Cuijpers JP, Lagerwaard FJ, et al: Recommendations for  
994 implementing stereotactic radiotherapy in peripheral stage IA non-small cell lung cancer:  
995 report from the Quality Assurance Working Party of the randomised phase III ROSEL  
996 study. Radiat.Oncol. 4:1, 2009

997  
998  
999

1000  
1001  
1002  
1003

## **APPENDIX 1 – Radiotherapy Dose Constraints**

### **A1.1 Normal tissue dose constraints for **THREE** fraction SABR regimens.**<sup>66</sup>

| <b>Serial Tissue</b>              | <b>Volume (mL)</b>          | <b>Volume Max (Gy)</b>               | <b>Max Point Dose (Gy)</b> | <b>Endpoint (≥Grade 3)</b> |
|-----------------------------------|-----------------------------|--------------------------------------|----------------------------|----------------------------|
| <b>THREE-FRACTION TREATMENT</b>   |                             |                                      |                            |                            |
| Optic pathway                     | <0.2                        | 15 (5 Gy/fx)                         | 19.5 (6.5 Gy/fx)           | Neuritis                   |
| Cochlea                           |                             |                                      | 20 (6.67 Gy/fx)            | Hearing loss               |
| Brainstem                         | <1                          | 18 (6 Gy/fx)                         | 23 (7.67 Gy/fx)            | Cranial neuropathy         |
| Spinal cord                       | <0.25                       | 18 (6 Gy/fx)                         | 22 (7.33 Gy/fx)            | Myelitis                   |
|                                   | <1.2                        | 11.1 (3.7 Gy/fx)                     |                            |                            |
| Cauda equina                      | <5                          | 21.9 (7.3 Gy/fx)                     | 24 (8 Gy/fx)               | Neuritis                   |
| Sacral plexus                     | <3                          | 22.5 (7.5 Gy/fx)                     | 24 (8 Gy/fx)               | Neuropathy                 |
| Esophagus*                        | <5                          | 21 (7 Gy/fx)                         | 27 (9 Gy/fx)               | Stenosis/fistula           |
| Ipsilateral brachial plexus       | <3                          | 22.5 (7.5 Gy/fx)                     | 24 (8 Gy/fx)               | Neuropathy                 |
| Heart/pericardium                 | <15                         | 24 (8 Gy/fx)                         | 30 (10 Gy/fx)              | Pericarditis               |
| Great vessels                     | <10                         | 39 (13 Gy/fx)                        | 45 (15 Gy/fx)              | Aneurysm                   |
| Trachea and ipsilateral bronchus* | <4                          | 15 (5 Gy/fx)                         | 30 (10 Gy/fx)              | Stenosis/fistula           |
| Skin                              | <10                         | 22.5 (7.5 Gy/fx)                     | 24 (8 Gy/fx)               | Ulceration                 |
| Stomach                           | <10                         | 21 (7 Gy/fx)                         | 24 (8 Gy/fx)               | Ulceration/fistula         |
| Duodenum*                         | <5                          | 15 (5 Gy/fx)                         | 24 (8 Gy/fx)               | Ulceration                 |
| Jejunum/ileum*                    | <5                          | 16.2 (5.4 Gy/fx)                     | 27 (9 Gy/fx)               | Enteritis/obstruction      |
| Colon*                            | <20                         | 20.4 (6.8 Gy/fx)                     | 30 (10 Gy/fx)              | Colitis/fistula            |
| Rectum*                           | <20                         | 20.4 (6.8 Gy/fx)                     | 30 (10 Gy/fx)              | Proctitis/fistula          |
| Bladder wall                      | <15                         | 15 (5 Gy/fx)                         | 30 (10 Gy/fx)              | Cystitis/fistula           |
| Penile bulb                       | <3                          | 21.9 (7.3 Gy/fx)                     | 42 (14 Gy/fx)              | Impotence                  |
| Femoral heads (right and left)    | <10                         | 21.9 (7.3 Gy/fx)                     |                            | Necrosis                   |
| Renal hilum/vascular trunk        | <2/3 volume                 | 18.6 (6.2 Gy/fx)                     |                            | Malignant hypertension     |
| <b>Parallel Tissue</b>            | <b>Critical Volume (mL)</b> | <b>Critical Volume Dose Max (Gy)</b> |                            | <b>Endpoint (≥Grade 3)</b> |
| Lung (right and left)             | 1,500                       | 10.5 (3.5 Gy/fx)                     |                            | Basic lung function        |
| Lung (right and left)             | 1,000                       | 11.4 (3.8 Gy/fx)                     |                            | Pneumonitis                |
| Liver                             | 700                         | 17.1 (5.7 Gy/fx)                     |                            | Basic liver function       |
| Renal cortex (right and left)     | 200                         | 14.4 (4.8 Gy/fx)                     |                            | Basic renal function       |

1004  
1005  
1006  
1007  
1008

1009  
1010

A1.2 Normal tissue dose constraints for **FIVE** fraction SABR regimens.<sup>66</sup>

| <b>Serial Tissue</b>              | <b>Volume (mL)</b>          | <b>Volume Max (Gy)</b> | <b>Max Point Dose (Gy)</b> | <b>Endpoint (≥Grade 3)</b> |
|-----------------------------------|-----------------------------|------------------------|----------------------------|----------------------------|
| <b>FIVE-FRACTION TREATMENT</b>    |                             |                        |                            |                            |
| Optic pathway                     | <0.2                        | 20 (4 Gy/fx)           | 25 (5 Gy/fx)               | Neuritis                   |
| Cochlea                           |                             |                        | 27.5 (5.5 Gy/fx)           | Hearing loss               |
| Brainstem                         | <1                          | 26 (5.2 Gy/fx)         | 31 (6.2 Gy/fx)             | Cranial neuropathy         |
| Spinal cord                       | <0.25                       | 22.5 (4.5 Gy/fx)       | 30 (6 Gy/fx)               | Myelitis                   |
|                                   | <1.2                        | 13.5 (2.7 Gy/fx)       |                            |                            |
| Cauda equina                      | <5                          | 30 (6 Gy/fx)           | 34 (6.4 Gy/fx)             | Neuritis                   |
| Sacral plexus                     | <3                          | 30 (6 Gy/fx)           | 32 (6.4 Gy/fx)             | Neuropathy                 |
| Esophagus*                        | <5                          | 27.5 (5.5 Gy/fx)       | 35 (7 Gy/fx)               | Stenosis/fistula           |
| Ipsilateral brachial plexus       | <3                          | 30 (6 Gy/fx)           | 32 (6.4 Gy/fx)             | Neuropathy                 |
| Heart/pericardium                 | <15                         | 32 (6.4 Gy/fx)         | 38 (7.6 Gy/fx)             | Pericarditis               |
| Great vessels                     | <10                         | 47 (9.4 Gy/fx)         | 53 (10.6 Gy/fx)            | Aneurysm                   |
| Trachea and ipsilateral bronchus* | <4                          | 18 (3.6 Gy/fx)         | 38 (7.6 Gy/fx)             | Stenosis/fistula           |
| Skin                              | <10                         | 30 (6 Gy/fx)           | 32 (6.4 Gy/fx)             | Ulceration                 |
| Stomach                           | <10                         | 28 (5.6 Gy/fx)         | 32 (6.4 Gy/fx)             | Ulceration/fistula         |
| Duodenum*                         | <5                          | 18 (3.6 Gy/fx)         | 32 (6.4 Gy/fx)             | Ulceration                 |
| Jejunum/ileum*                    | <5                          | 19.5 (3.9 Gy/fx)       | 35 (7 Gy/fx)               | enteritis/obstruction      |
| Colon*                            | <20                         | 25 (5 Gy/fx)           | 38 (7.6 Gy/fx)             | colitis/fistula            |
| Rectum*                           | <20                         | 25 (5 Gy/fx)           | 38 (7.6 Gy/fx)             | proctitis/fistula          |
| Bladder wall                      | <15                         | 18.3 (3.65 Gy/fx)      | 38 (7.6 Gy/fx)             | cystitis/fistula           |
| Penile bulb                       | <3                          | 30 (6 Gy/fx)           | 50 (10 Gy/fx)              | Impotence                  |
| Femoral heads (right and left)    | <10                         | 30 (6 Gy/fx)           |                            | Necrosis                   |
| Renal hilum/vascular trunk        | <2/3 volume                 | 23 (4.6 Gy/fx)         |                            | Malignant hypertension     |
| <b>Parallel Tissue</b>            | <b>Critical Volume (mL)</b> | <b>Critical Volume</b> | <b>Dose Max (Gy)</b>       | <b>Endpoint (≥Grade 3)</b> |
| Lung (right and left)             | 1,500                       |                        | 12.5 (2.5 Gy/fx)           | Basic lung function        |
| Lung (right and left)             | 1000                        |                        | 13.5 (2.7 Gy/fx)           | Pneumonitis                |
| Liver                             | 700                         |                        | 21 (4.2 Gy/fx)             | Basic liver function       |
| Renal cortex (right and left)     | 200                         |                        | 17.5 (3.5 Gy/fx)           | Basic renal function       |

\*Avoid circumferential irradiation.

1011  
1012

1013 A1.3. Dose constraints for EIGHT-fraction SABR regimens.

1014  
 1015 Note: for targets overlapping the stomach or esophagus, 12 fractions should be used, with  
 1016 a maximum dose of 48 Gy in 12 fractions for either organ. For any organs not listed, or for  
 1017 OARs for 12 fraction regimens, a biologically effective dose can be calculated using an  
 1018 alpha-beta ratio of 2.  
 1019

| <b>Structure</b>                                 | <b>Maximum Dose</b>                                                |
|--------------------------------------------------|--------------------------------------------------------------------|
| <b>Liver</b>                                     | At least 700 cc below 22 Gy (unless using NTCP calculation method) |
| <b>Kidney (right and left)</b>                   | At least 200 cc below 21 Gy                                        |
| <b>Spinal Cord</b>                               | 32 Gy point dose<br>V(27 Gy) < 0.25 cc<br>V(16 Gy) < 1.25 cc       |
| <b>Stomach</b>                                   | 40 Gy point dose<br>V(34 Gy) < 10 cc                               |
| <b>Esophagus</b>                                 | 40 Gy point dose<br>V(33 Gy) < 5 cc                                |
| <b>Great Vessels</b>                             | 65 Gy point dose<br>V(58 Gy) < 10 cc                               |
| <b>Trachea and Ipsilateral Mainstem Bronchus</b> | 40 Gy point dose<br>V(21.5 Gy) < 4 cc                              |
| <b>Ipsilateral Brachial Plexus</b>               | 39 Gy point dose<br>V(36.5 Gy) < 3 cc                              |
| <b>Heart/Pericardium</b>                         | 46 Gy point dose<br>V(39 Gy) < 15 cc                               |
| <b>Duodenum</b>                                  | 39 Gy point dose<br>V(21.5 Gy) < 5 cc                              |
| <b>Jejunum/Ileum</b>                             | 40 Gy point dose<br>V(23 Gy) < 5 cc                                |

1020 V(X) Gy): volume of structure receiving X Gy or more (i.e. for the stomach, V34 Gy is the  
 1021 volume of stomach receiving 34 Gy or more).  
 1022



1023 **A1.4. Dose conformity parameters for lung SABR treatments**  
 1024 **From Hurkmans *et al*, 2010<sup>67</sup>**  
 1025

Radiation Oncology 2009, 4:1

<http://www.ro-journal.com/content/4/1/1>

**Table 1: Dose conformity requirements and definition of protocol deviations.  $R_{100\%}$  and  $R_{50\%}$  = ratio of respectively the 100% and 50% Prescription Isodose Volume to the PTV.  $D_{2\text{ cm}}$  = dose maximum at 2 cm from the PTV as percentage of the prescribed dose.  $V_{20\text{ Gy}}$  = Percent of lung receiving 20 Gy or more (both lungs minus GTV).**

| $R_{100\%}$ |           | Type A models (standard algorithms)      |       |                        |       |           |       | $V_{20\text{ Gy}} (\%)$ |  | PTV (cc) |
|-------------|-----------|------------------------------------------|-------|------------------------|-------|-----------|-------|-------------------------|--|----------|
|             |           | $R_{50\%}$                               |       | $D_{2\text{ cm}} (\%)$ |       |           |       |                         |  |          |
| Deviation   |           | Deviation                                |       | Deviation              |       | Deviation |       |                         |  |          |
| None        | Minor     | None                                     | Minor | None                   | Minor | None      | Minor |                         |  |          |
| <1.15       | 1.15–1.25 | <8                                       | 8–10  | <55                    | 55–60 | <4        | 4–6   | 0–20                    |  |          |
| <1.15       | 1.15–1.25 | <7                                       | 7–8   | <65                    | 65–70 | <6        | 6–8   | 20–40                   |  |          |
| <1.10       | 1.10–1.20 | <6                                       | 6–6.5 | <65                    | 65–75 | <8        | 8–10  | >40                     |  |          |
| $R_{100\%}$ |           | Type B models (more advanced algorithms) |       |                        |       |           |       | $V_{20\text{ Gy}} (\%)$ |  | PTV (cc) |
|             |           | $R_{50\%}$                               |       | $D_{2\text{ cm}} (\%)$ |       |           |       |                         |  |          |
| Deviation   |           | Deviation                                |       | Deviation              |       | Deviation |       |                         |  |          |
| None        | Minor     | None                                     | Minor | None                   | Minor | None      | Minor |                         |  |          |
| <1.25       | 1.25–1.40 | <12                                      | 12–14 | <65                    | 65–75 | <5        | 5–8   | 0–20                    |  |          |
| <1.15       | 1.15–1.25 | <9                                       | 9–11  | <70                    | 70–80 | <6        | 6–10  | 20–40                   |  |          |
| <1.10       | 1.10–1.20 | <6                                       | 6–8   | <70                    | 70–80 | <10       | 10–15 | >40                     |  |          |

1026  
 1027  
 1028

1029 **APPENDIX 2**

1030  
1031 **LETTER OF INFORMATION [TEMPLATE]**

1032  
1033 **A Phase II Trial Measuring the Integration of Stereotactic Radiotherapy plus Surgery**  
1034 **in Early Non-Small Cell Lung Cancer**

1035  
1036 **(MISSILE-NSCLC)**

1037 Introduction

1038  
1039 You are being invited to participate in this study because you have a lung cancer (called non-  
1040 small cell lung cancer) that is less than 5 cm in size and has not spread to any other areas of  
1041 the body, such as the lymph nodes or other organs.

1042  
1043 The standard treatment for a lung cancer such as yours is surgery. In healthy patients, this  
1044 surgery removes a whole lobe of the lung (called a 'lobectomy'), and in less-healthy patients, the  
1045 surgery removes less than a whole lobe of the lung (called a 'sub-lobar' surgery).

1046  
1047 'Stereotactic ablative radiation' (called SABR) is a new radiation treatment that delivers high-  
1048 dose, precise radiation to small tumors in 1-3 weeks of treatment. This new technique can  
1049 potentially allow radiation treatments to be focused more precisely, and delivered more  
1050 accurately than with older treatments. This improvement could help by reducing side effects  
1051 and by improving the chance of controlling the cancer by more precisely treating the cancer.

1052  
1053 The study combines both SABR and surgery to treat lung cancer. SABR will be done first, with  
1054 the surgery done approximately 10 weeks later. There will be some extra imaging (described  
1055 below) done before and after the SABR. The purpose of this study is to determine how effective  
1056 SABR is in killing the cancer cells, and if SABR can help make surgery more effective.

1057  
1058  
1059 The study starts with some additional scans to better understand your tumor. These scans will  
1060 be done in a single day at St. Joseph's Health Centre, and include a scan called a 'Dynamic  
1061 Contrast Enhanced CT scan (DCE-CT)', and a Positron-Emission Tomography (PET) scan.

1062  
1063 After these scans, patients will receive SABR. SABR treatments will be given every other day,  
1064 on weekdays, over 1-3 weeks, depending on the location of your tumor. A CT scan through the  
1065 region being treated will be taken on the radiation unit prior to treatment each day and your  
1066 position for the treatment adjusted if necessary. Once your positioning is confirmed, the  
1067 treatment will be given.

1068  
1069 The scans will be repeated 8 weeks after SABR, along with a PET/CT scan and a thin-slice CT  
1070 scan looking at your tumor. Surgery will be done approximately 10 weeks after SABR.

1071  
1072 You will be followed regularly by your cancer specialists before and after treatment for 5 years.  
1073 The effects of the treatment and any side effects will be measured. You will also have follow-  
1074 up scans to assess the effects of treatment. As part of the study, you will be asked to fill out  
1075 questionnaires before and after treatment. These questionnaires can be expected to take 5-10  
1076 minutes to complete on each occasion.

1078 Potential Benefits of Participating in the Study

1079 Potential benefits of participating in the study include the possibility improving your chances of  
1080 curing the cancer using SABR.

1081  
1082 Risks and Discomforts of the Scans

1083 If you participate in the study, you will have 3 extra scans prior to SABR, and the same 3 scans  
1084 after SABR. The results of the scans will be used for research purposes only and will not affect  
1085 your treatment.

1086  
1087 These scans include CT scanning. Since CT scans use x-rays, an ionizing radiation, there is a  
1088 small risk associated. The risk is that of developing another cancer. In comparison to the  
1089 radiotherapy used for SABR, the amount of radiation from the extra CT scans as a result of  
1090 participating in this study will be very minimal. The extra radiation dose from each CT scans is  
1091 estimated at approximately 10 mSv. The additional risk of cancer from a single CT is adult is  
1092 estimated at less than 0.005% (5 in 100,000). The DCE-CT requires injection of a contrast  
1093 agent called Visopaque 320. These scans also include a positron emission tomography (PET)  
1094 scan which involve the injection of a small amount of radioactive sugar into a vein.

1095  
1096 Risks and discomforts of SABR

1097 Potential side effects from radiation depend on the area being treated:

- 1098 • Radiation treatments to the chest area may commonly cause fatigue, dry cough, sore throat  
1099 or difficulty swallowing as well as mild sunburn of the skin. Delayed (late, >6 months post  
1100 treatment) side effects from radiation treatments to the chest area may rarely cause new or  
1101 persistent difficulties with swallowing; shortness of breath or cough.
- 1102  
1103 • Radiation treatments are associated with a small risk of serious injury to tissues or organs  
1104 that are included in the area being treated. This injury may show up months to years post  
1105 treatment. In very rare instances, these side effects may result in death. Some of these  
1106 side effects include (depending on whether these areas are being treated):
  - 1107 • Spinal cord injury resulting in paraplegia
  - 1108 • Lung injury resulting in shortness of breath
  - 1109 • Esophagus injury resulting in difficulty swallowing
  - 1110 • Heart injury resulting in a heart attack or fluid collection on the heart
  - 1111 • Bone injury resulting in a broken bone

1112  
1113 Your physician will monitor your therapy and make adjustments to your treatment or prescribe  
1114 medicines in order to manage side effects that occur during treatment. The radiation  
1115 technique, daily dose and total dose of radiation for your treatment will be prescribed by your  
1116 physician in order to minimize the chance of late serious injury as outlined above.

1117  
1118 Risks and discomforts of surgery

1119  
1120 Common side effects after surgery include a prolonged need for chest tube drainage after  
1121 surgery, persistent cough, shortness of breath or difficulty breathing.

1122  
1123 Less common side effects include lung infection or a pneumonia, a blood clot in the lung, a  
1124 blood clot in a large vein (which can cause a stroke or a heart attack in some cases), prolonged  
1125 intubation or repeat intubation (a tube placed in the airway to help breathing), infection,  
1126 bleeding, leakage of air from the lung after your lung cancer, injury to the laryngeal nerves (may  
1127 cause hoarseness or difficulty swallowing), or changes in lung function tests.

Version 1.3  
September 6, 2017

1128  
1129 Rare side effects include a severe infection (called sepsis), heart attack, irregular or rapid  
1130 heartbeat, severe inflammation of the lung that affects the ability to breathe, or severe bleeding.

1131  
1132 Withdrawal from the study

1133  
1134 Participation in this study is voluntary. You may withdraw from the study at any time and still  
1135 continue under the care of your radiation oncologist.

1136  
1137 Privacy and Confidentiality:

1138  
1139 All data that will be collected from this study will be considered confidential. We will maintain  
1140 your confidentiality by using a unique identifier number on all documents instead of your name.  
1141 A separate secure document will contain the linkage between your name and identifier number  
1142 in order to minimize the possibility of a breach of your privacy. Your research records will be  
1143 stored in a locked cabinet at the clinical trials unit. Once the data has been put into the  
1144 research database, any identifying information, apart from your initials and a unique study  
1145 number, will be removed from the database in order to protect your confidentiality. If the results  
1146 of the study are published, your name will not be used and no information that discloses your  
1147 identity will be released or published without your explicit consent. By signing this consent form;  
1148 you hereby consent to participation in this study. By consenting to this study you agree to allow  
1149 us to confidentially collect this data. If you do not consent to this data collection, then you  
1150 cannot participate in this study. Representatives of your local Research Ethics Board and the  
1151 research team at your hospital may contact you or require access to your study-related records  
1152 to monitor the conduct of the research.

1153  
1154 If, during the course of this study, new information becomes available that may relate to your  
1155 willingness to continue to participate, this information will be provided to you by the investigator.

1156  
1157 Patient Rights:

1158  
1159 Your participation in this study is voluntary. You may refuse to participate, refuse to answer any  
1160 questions, or you may withdraw from the study at any time with no effect on your future care. If  
1161 you decide not to participate or if you withdraw from the study before it is completed, the  
1162 alternative procedures or courses of action will be explained to you by your doctor. A Data  
1163 Safety Monitoring Committee will be reviewing the data from this research on a regular basis  
1164 throughout the study. This will ensure that the participants are not exposed to increased risks  
1165 as part of the study. If you are already participating in another study at this time, please inform  
1166 the study doctor right away to determine if it is appropriate for you to participate in this study.  
1167 We will tell you about new information that may affect your health, welfare, or willingness to stay  
1168 in this study. If the results of the study are published, your name will not be used. If you would  
1169 like to receive a copy of the overall results of this study, please put your name and address on a  
1170 blank piece of paper and give it to the Clinical Research Associate.

1171  
1172 If you have any questions about your rights as a research participant or the conduct of the study  
1173 you may contact VP Research, Chief Administrator Officer, Lawson Health Research Institute,  
1174 519-667-6649.

1175  
1176 Compensation and Costs:

1177

1178 For taking part in this research study, the extra costs associated with parking to get the  
1179 additional scans will be reimbursed (you will be provided with parking vouchers for those visits).  
1180 Taking part in the study may result in added costs to you (e.g. travel to the cancer clinic, etc.).  
1181 In the event you are injured as a consequence of participation in this study due to the  
1182 administration of the study treatment and/or procedure(s), your medical condition will be  
1183 evaluated and medical care will be provided by one of the investigators or you will be referred  
1184 for appropriate treatment. Although no funds have been set aside to compensate you in the  
1185 event of injury or illness related to the study treatment or procedures, you do not waive any or  
1186 your legal rights for compensation by signing the consent form.  
1187  
1188 A copy of this letter is for you to keep.

1189  
1190  
1191  
1192  
1193  
1194  
1195  
1196  
1197  
1198  
1199  
1200  
1201  
1202  
1203  
1204  
1205  
1206  
1207  
1208  
1209  
1210  
1211  
1212  
1213  
1214  
1215  
1216

**CONSENT FORM**

**A Phase II Trial Measuring the Integration of Stereotactic  
Radiotherapy *plus* Surgery in Early Non-Small Cell Lung  
Cancer**

**(MISSILE-NSCLC)**

I have read the accompanying letter of information and have had the nature of the study explained to me and I agree to participate. All questions have been answered to my satisfaction. Upon signing this form I will receive a copy.

\_\_\_\_\_  
Date

\_\_\_\_\_  
Patient's Signature

I certify that I have explained to the individual the nature and purpose, the potential benefits and possible risks associated with participation in this research study, have answered any questions that have been raised and have witnessed the above signature.

\_\_\_\_\_  
Date

\_\_\_\_\_  
Investigator's Signature

1217  
1218 **Summary of Changes from Original Protocol (May 2014) to**  
1219 **Final Protocol (Sept 2017)**  
1220

1221 **Dec 2015 Amendment**  
1222

1223 **Section 6.0 Treatment Plan**

- 1224 • imaging at 8 weeks allows +/- 2 weeks for normal scheduling variability, holidays, and scanner  
1225 shutdown  
1226

1227 **Section 9.0 - Follow-Up Evaluation and Assessment of Efficacy**  
1228

- 1229 • visits are now specified to be time from date of surgery- Clarification purpose  
1230 • stopping PAR at 1 year and QOL at 2 year - reduce questionnaire burden.  
1231

1232 **March 2016 Amendment**

1233 **Section 9.0 Follow up Evaluation and Assessment of Efficacy**  
1234

- 1235 1. Removal of PFTs at 3 month post-surgery visit: not considered clinically indicated  
1236  
1237 2. Follow-up with surgeon: It is standard of care for patients to be followed by surgeons. The current  
1238 protocol has introduced duplication, as the patient must visit the surgeon and also visit radiation  
1239 oncologist separately only to have trial data collected.  
1240  
1241

1242 **September 2017 Amendment**  
1243

1244 **Added new translational objective (page 9):**  
1245

- 1246 5. To assess the immunological effects of SABR on the NSCLC tumor micro-environment  
1247

1248 **Added new section: 12.0 BIOMARKER STUDIES**  
1249

1250 This patient population offers a great opportunity to assess the immunological effects of SABR on the  
1251 NSCLC tumor micro-environment. This could also provide clues for the best future immunotherapy  
1252 combinations. In collaboration with researchers at VU University Medical Center in Amsterdam  
1253 Netherlands, multiplex (7-parameter) ICH will be performed on pre and post-treatment tumor biopsies.

1254 **Required Samples:**

- 1255 1) Core biopsy pre-treatment for all patients (10 slides, unstained, at 5um thickness)  
1256 2) Post-radiotherapy tumor tissue at resection and slides from the hilar lymph nodes, if possible. (10  
1257 slides, unstained, at 5um thickness)

1258 **Planned Analyses:**

- 1259 1) Multiplex (7-parameter) ICH with immune parameters  
1260 ○ Panels:  
1261 • Tumor panel: IDO, PDL1, PDL2, HCA2, HC10, B2m  
1262 • T-cell panels: CD3, CD8, FoxP3, TBet, Ki67, GranzymeB; and CD3, CD8, PD1,  
1263 Tim3, Lag3, GranzymeB  
1264
