# Supplementary material
Source: PubMed Central journal article supplement (PMC6512269)
Supplement: jamaoncol-5-681-s002.pdf [file jamaoncol-5-681-s002.pdf]

## Supplementary Online Content

Palma DA, Nguyen TK, Louie AV, et al. Measuring the integration of stereotactic ablative radiotherapy plus surgery for early-stage non–small cell lung cancer: a phase 2 clinical trial. *JAMA Oncol*. Published online February 21, 2019. doi:10.1001/jamaoncol.2018.6993

**eFigure.** Kaplan-Meier plots for patients receiving surgery for (a) overall survival, (b) local control, (c) regional control, and (d) distant control (n=36)

**eTable.** Summary of quality of life end points for all patients and stratified by follow-up visit (n=40)

This supplementary material has been provided by the authors to give readers additional information about their work.

**eFigure.** Kaplan-Meier plots for patients receiving surgery for (a) overall survival, (b) local control, (c) regional control, and (d) distant control (n=36)

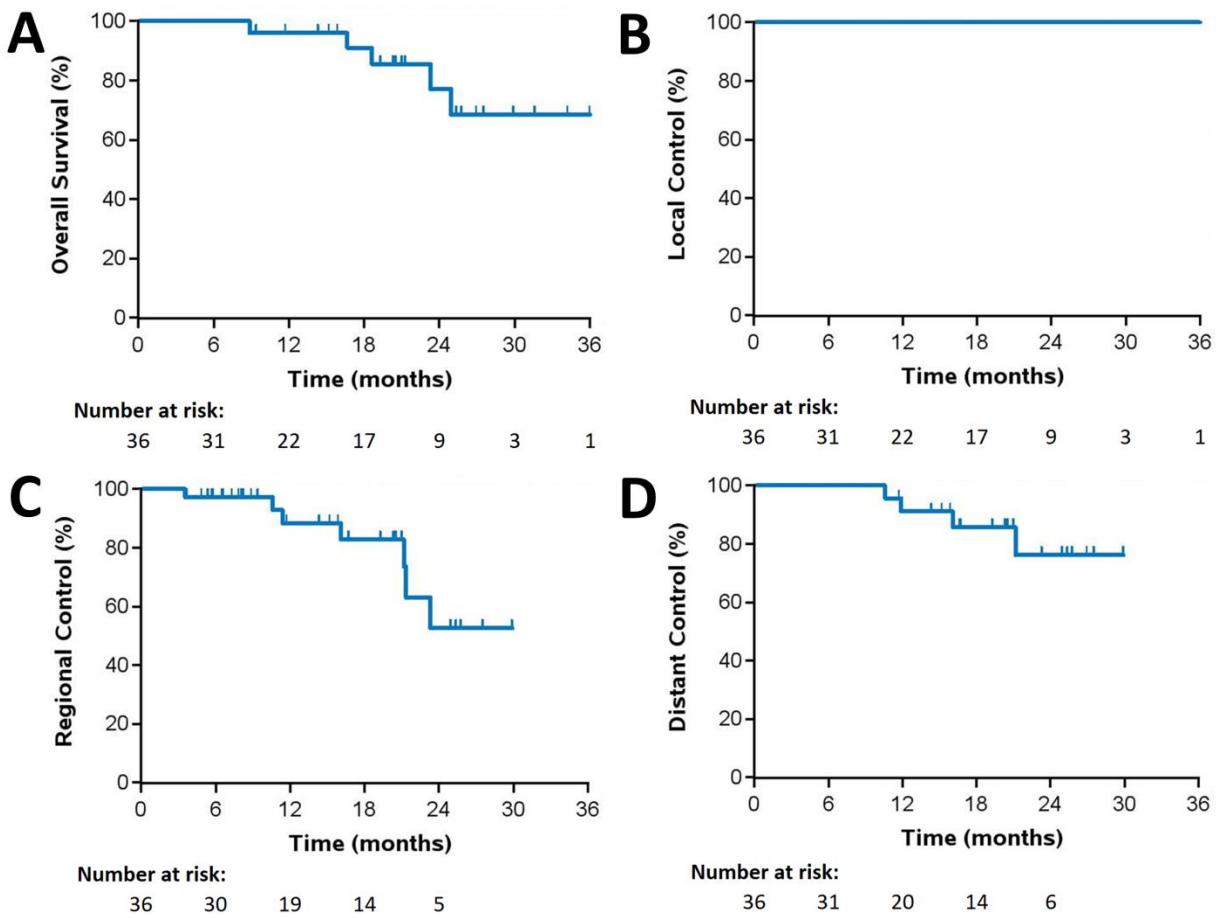

**eTable.** Summary of quality of life end points for all patients and stratified by follow-up visit (n=40)

| Characteristic                                            | Follow-up Visit      |                          |                              |                              |
|-----------------------------------------------------------|----------------------|--------------------------|------------------------------|------------------------------|
|                                                           | Pre-treatment (n=40) | 8 Weeks Post-SABR (n=35) | 3 Months Post-Surgery (n=28) | 9 Months Post-Surgery (n=20) |
| <b>FACT-G Physical</b> – mean ± SD                        | 25.2 ± 4.7           | 24.2 ± 5.2               | 24.3 ± 3.5                   | 23.7 ± 4.6                   |
| <b>vs. Pre-treatment</b>                                  | --                   | -0.8 ± 2.8               | -1.8 ± 3.8                   | -2.3 ± 4.2                   |
| <b>p-value</b>                                            | --                   | 0.11                     | <b>0.02</b>                  | <b>0.02</b>                  |
| <b>FACT-G Social</b> – mean ± SD                          | 25.4 ± 3.1           | 26.2 ± 2.4               | 26.1 ± 2.5                   | 25.7 ± 2.8                   |
| <b>vs. Pre-treatment</b>                                  | --                   | 0.7 ± 2.2                | 0.6 ± 2.9                    | -0.7 ± 3.4                   |
| <b>p-value</b>                                            | --                   | 0.05                     | 0.26                         | 0.38                         |
| <b>FACT-G Emotional</b> – mean ± SD                       | 18.9 ± 3.6           | 19.3 ± 4.1               | 20.5 ± 2.5                   | 20.5 ± 3.2                   |
| <b>vs. Pre-treatment</b>                                  | --                   | 0.5 ± 3.3                | 2.2 ± 3.8                    | 1.5 ± 2.5                    |
| <b>p-value</b>                                            | --                   | 0.35                     | <b>0.005</b>                 | <b>0.02</b>                  |
| <b>FACT-G Functional</b> – mean ± SD                      | 22.1 ± 5.3           | 21.4 ± 6.1               | 21.4 ± 4.9                   | 20.6 ± 6.2                   |
| <b>vs. Pre-treatment</b>                                  | --                   | -0.6 ± 3.8               | -1.0 ± 5.5                   | -2.3 ± 6.4                   |
| <b>p-value</b>                                            | --                   | 0.37                     | 0.36                         | 0.13                         |
| <b>FACT-G Total Score<sup>a</sup></b> – mean ± SD         | 91.5 ± 12.2          | 91.1 ± 14.4              | 92.4 ± 8.8                   | 90.5 ± 13.3                  |
| <b>vs. Pre-treatment</b>                                  | --                   | -0.1 ± 7.0               | 0.0 ± 10.2                   | -3.8 ± 11.7                  |
| <b>p-value</b>                                            | --                   | 0.94                     | >0.99                        | 0.16                         |
| <b>FACT-L Total Score<sup>b</sup></b> – mean ± SD         | 113.6 ± 13.9         | 114.8 ± 15.5             | 113.9 ± 11.3                 | 112.3 ± 16.3                 |
| <b>vs. Pre-treatment</b>                                  | --                   | 1.2 ± 8.6                | -0.4 ± 11.8                  | -4.0 ± 13.7                  |
| <b>p-value</b>                                            | --                   | 0.44                     | 0.85                         | 0.21                         |
| <b>Fact-L Trial Outcome Index<sup>c</sup></b> – mean ± SD | 69.4 ± 10.9          | 68.8 ± 12.2              | 67.3 ± 9.3                   | 66.1 ± 12.8                  |
| <b>vs. Pre-treatment</b>                                  | --                   | -0.3 ± 7.7               | -3.2 ± 10.1                  | -4.8 ± 12.2                  |
| <b>p-value</b>                                            | --                   | 0.80                     | 0.11                         | 0.10                         |
| <b>Trial Outcome Index<sup>3</sup></b> – no.(%)           |                      |                          |                              |                              |
| Increase (≥ 5 point increase)                             | --                   | 7 (21)                   | 5 (18)                       | 5 (25)                       |
| Stable (< 5 point change)                                 | --                   | 19 (56)                  | 13 (46)                      | 8 (40)                       |
| Decrease (≥ 5 point decrease)                             | --                   | 8 (23)                   | 10 (36)                      | 7 (35)                       |

<sup>a</sup>Defined as sum of FACT-G Physical, Social, Emotional and Functional well-being;

<sup>b</sup>Defined as sum of FACT-G Physical, Social, Emotional and Functional well-being and Lung Cancer Subscale;

<sup>c</sup>Defined as sum of FACT-G Physical and Functional well-being and Lung Cancer Subscale;

P-values < 0.05 shown as **BOLD**.
