# Supplementary material
Source: PubMed Central journal article supplement (PMC6512269)
Supplement: jamaoncol-5-681-s003.pdf [file jamaoncol-5-681-s003.pdf]

## Data Sharing Statement

Palma. Measuring the Integration of Stereotactic Ablative Radiotherapy Plus Surgery for Early-Stage Non-Small Cell Lung Cancer. *JAMA Oncol.* Published February 21, 2019.

10.1001/jamaoncol.2018.6993

### Data

**Data available:** No

### Additional Information

**Explanation for why data not available:** The trial protocol did not include a data sharing plan, and therefore data from the trial will not be shared publicly as sharing was not included in the ethics approvals.
